# Supplementary material for: High Methoxyl Pectin and Sodium Caseinate Film Matrix Reinforced with Green Carbon Quantum Dots: Rheological and Mechanical Studies
Source: MDPI journal article supplement (doi:10.3390/membranes12070695), 2022-07-07
Supplement: s1 [file s1]

## Supplementary Information

### High Methoxyl Pectin and Sodium Caseinate Films Matrix Rein-Forced with Green Carbon Quantum Dots: Rheological and Mechanical Studies

Clarissa Murru <sup>1</sup>, Mohammad Amin Mohammadifar <sup>2</sup>, Jakob Birkedal Wagner <sup>3</sup>, Rosana Badía Laiño

<sup>1</sup>, Marta Elena Díaz García <sup>1</sup>

<sup>1</sup> Departamento de Química Física y Analítica, Universidad de Oviedo, Oviedo, Asturias, 33006, Spain

<sup>2</sup> Research Group for Food Production Engineering, National Food Institute, Technical University of Denmark, SøtoftsPlads, 2800 Kongens Lyngby, Denmark

<sup>3</sup> DTU Nanolab, Technical University of Denmark, Fysikvej, DK-2800 Kgs. Lyngby, Denmark

**Figure S1.** Viscosity flow curves (log-log plot) of CAS:HMP suspensions (25:75 v/v ratio, pH 3.81  $\pm$  0.4) in the absence and presence of APCDs measured at 25°C. Inset table: Flow parameter

● CAS/HMP, ● CAS/HMP+0.25%APCDs, ● CAS/HMP+0.5%APCDs, ● CAS/HMP+1.0%APCDs.

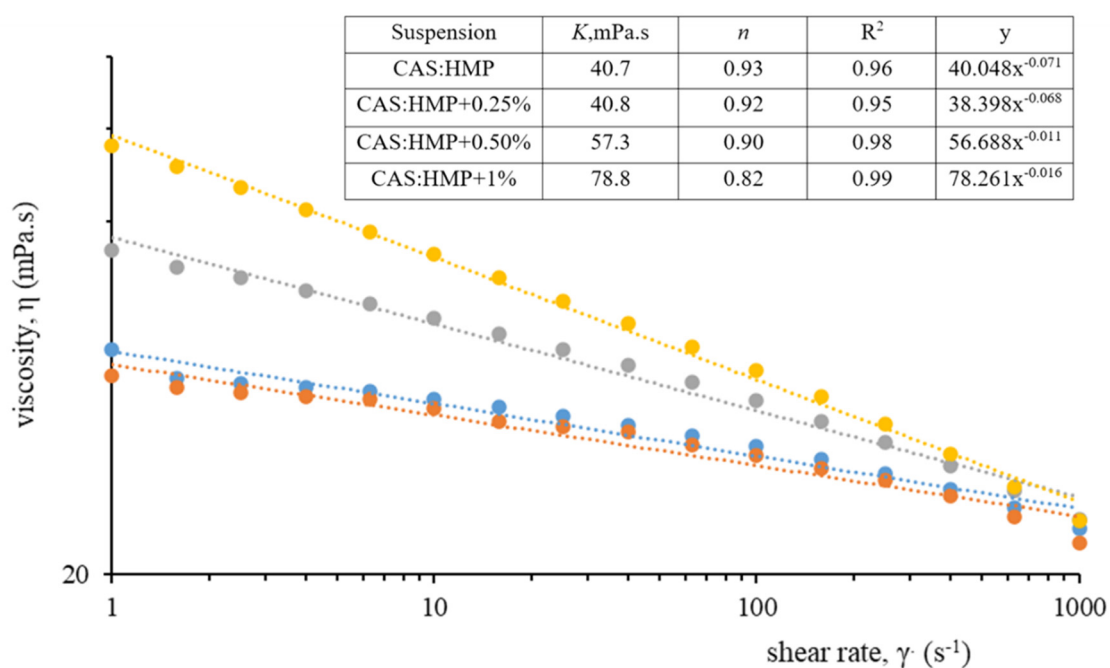

**Figure S2.** DSC thermograms of CAS /HMP films reinforced with APCDs

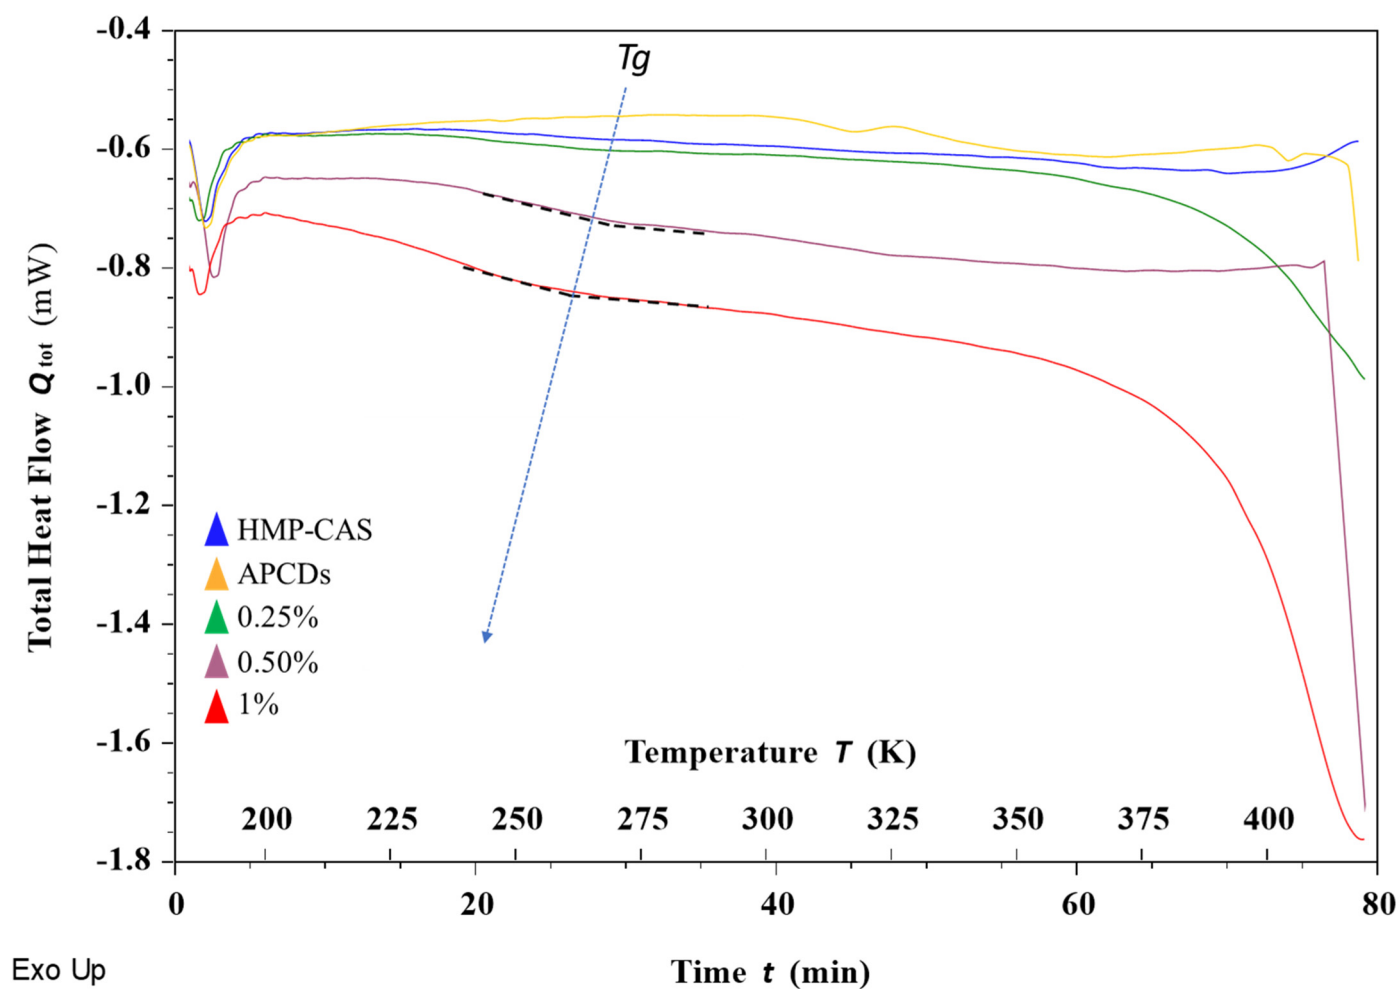

**Figure S3.** Complex modulus versus frequency in double logarithmic scales for CAS/HMP suspensions containing different amounts of APCDs: 0% (—), 0.25% (—), 0.5% (—) and 1.0% (—).

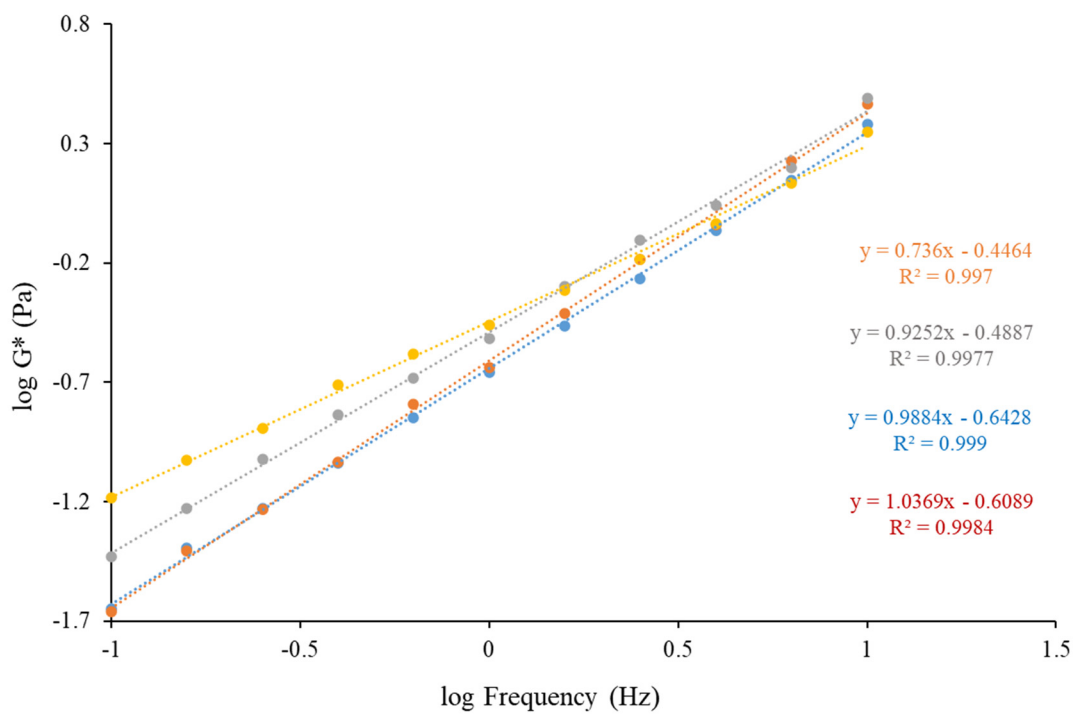

**Figure S4.** Loss tangent versus frequency for CAS/HMP suspensions containing different amounts of APCDs: 0% (—), 0.25% (—), 0.5% (—) and 1.0% (—).

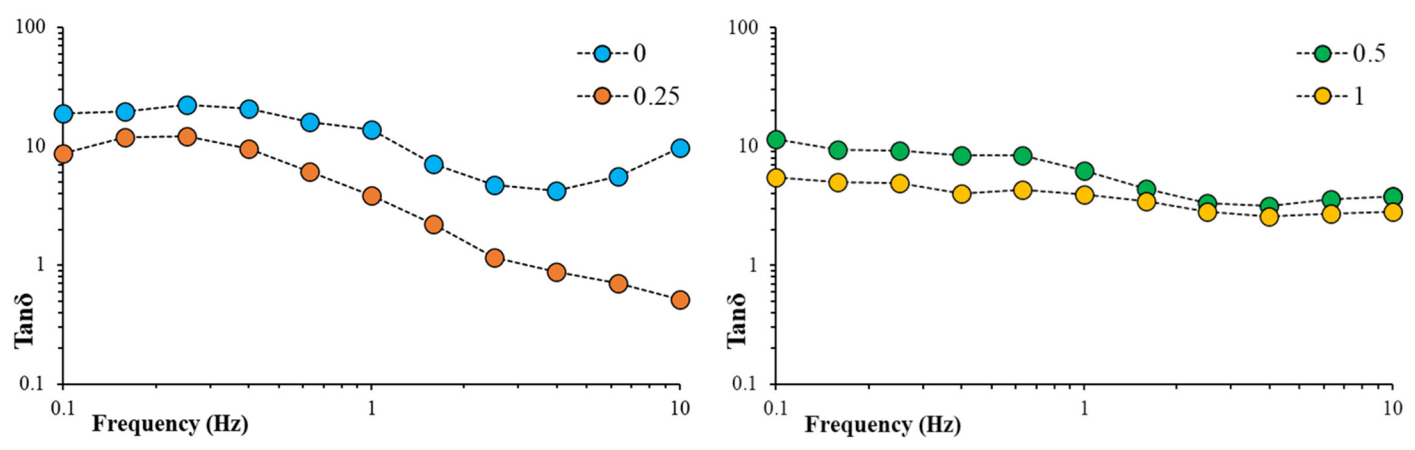

**Figure S5.** Rheological behaviour as a function of temperature and relative humidity ( ● 10% RH, ● 50%RH, ● 70%RH.) of *biofilms* CAS/HMP+1.0APCDs.

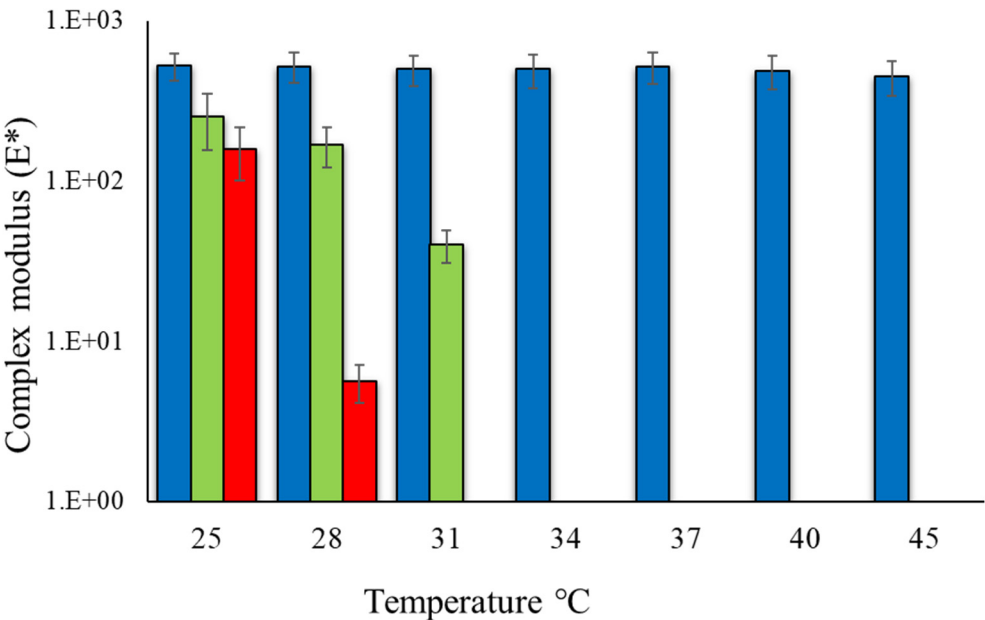

**Figure S6.** Rheological behaviour of biofilms as a function of exposure time at different temperatures. ● CAS/HMP, ● CAS/HMP+0.25APCDs, ● CAS/HMP+0.5APCDs, ●

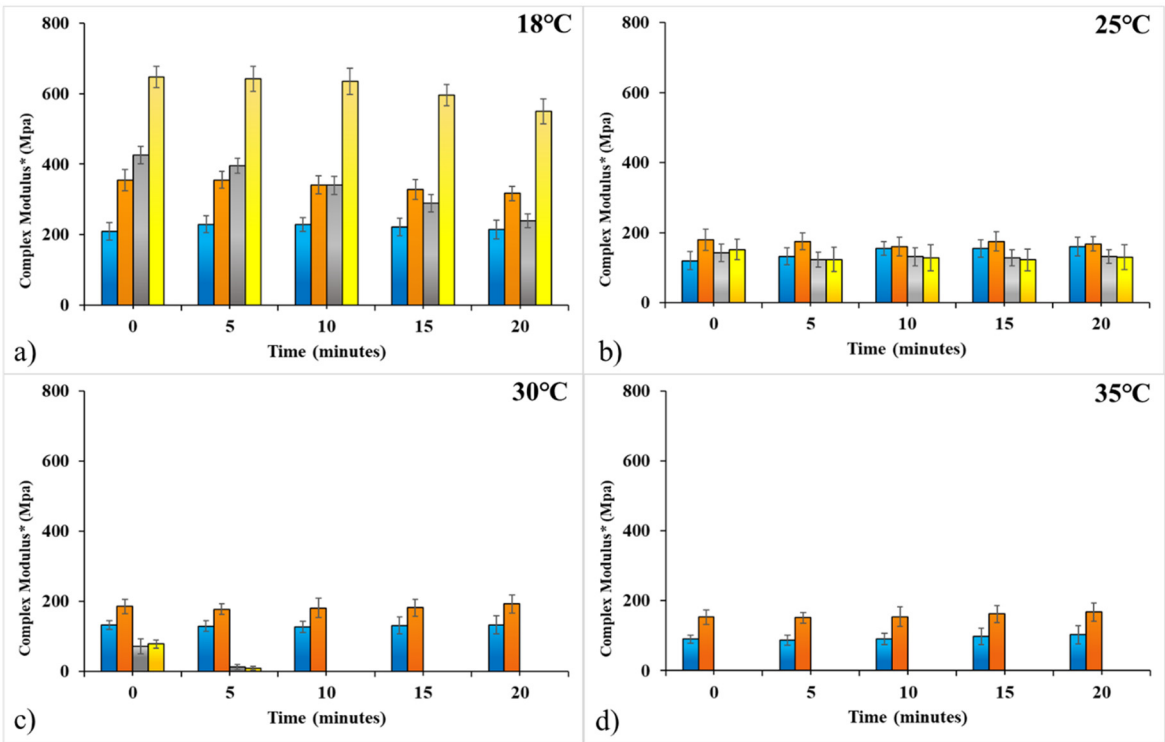

Filename: membranes-1794000-supplementary.docx  
Directory: E:\7.7\pharmaceuticals-1793104  
Template: C:\Users\MDPI\AppData\Roaming\Microsoft\Templates\Normal.  
dotm  
Title:  
Subject:  
Author: clarissa murru  
Keywords:  
Comments:  
Creation Date: 4/3/2022 9:43:00 PM  
Change Number: 24  
Last Saved On: 6/30/2022 9:47:00 PM  
Last Saved By: clarissa murru  
Total Editing Time: 3 Minutes  
Last Printed On: 7/7/2022 3:38:00 PM  
As of Last Complete Printing  
Number of Pages: 4  
Number of Words: 245 (approx.)  
Number of Characters: 1,414 (approx.)
